# Supplementary material for: Functional connectomics of affective and psychotic pathology
Source: PubMed Central journal article supplement (PMC6500110; doi:10.1073/pnas.1820780116), 2019-04-15
Supplement: pnas.1820780116.sapp.pdf [file pnas.1820780116.sapp.pdf]

SUPPLEMENTAL: Functional connectomics of affective and psychotic pathology

Justin T. Baker<sup>a,b\*</sup>, Daniel G. Dillon<sup>b,c</sup>, Lauren M. Patrick<sup>d</sup>, Joshua L. Roffman<sup>b,e,f</sup>, Roscoe O. Brady, Jr.<sup>a,b,g</sup>, Diego A. Pizzagalli<sup>b,c</sup>, Dost Öngür<sup>a,b</sup>, Avram J. Holmes<sup>c,d,h\*</sup>

<sup>a</sup>Schizophrenia and Bipolar Disorder Program, McLean Hospital, Belmont, MA 02478

<sup>b</sup>Department of Psychiatry, Harvard Medical School, Boston, MA 02114

<sup>c</sup>Center for Depression, Anxiety and Stress Research, McLean Hospital, Belmont, MA 02478

<sup>d</sup>Department of Psychology, Yale University, New Haven, CT 06520

<sup>e</sup>Athinoula A. Martinos Center for Biomedical Imaging, Massachusetts General Hospital Charlestown, MA 02129

<sup>f</sup>Department of Psychiatry, Massachusetts General Hospital, Boston, MA 02114

<sup>g</sup>Department of Psychiatry, Beth Israel Deaconess Medical Center, Boston, MA 02114

<sup>h</sup>Department of Psychiatry, Yale University, New Haven, CT 06520

\*Correspondence and requests for materials should be addressed to A.J.H. (email: [avram.holmes@yale.edu](mailto:avram.holmes@yale.edu)) or to J.T.B. (email: [jtbaker@partners.org](mailto:jtbaker@partners.org))

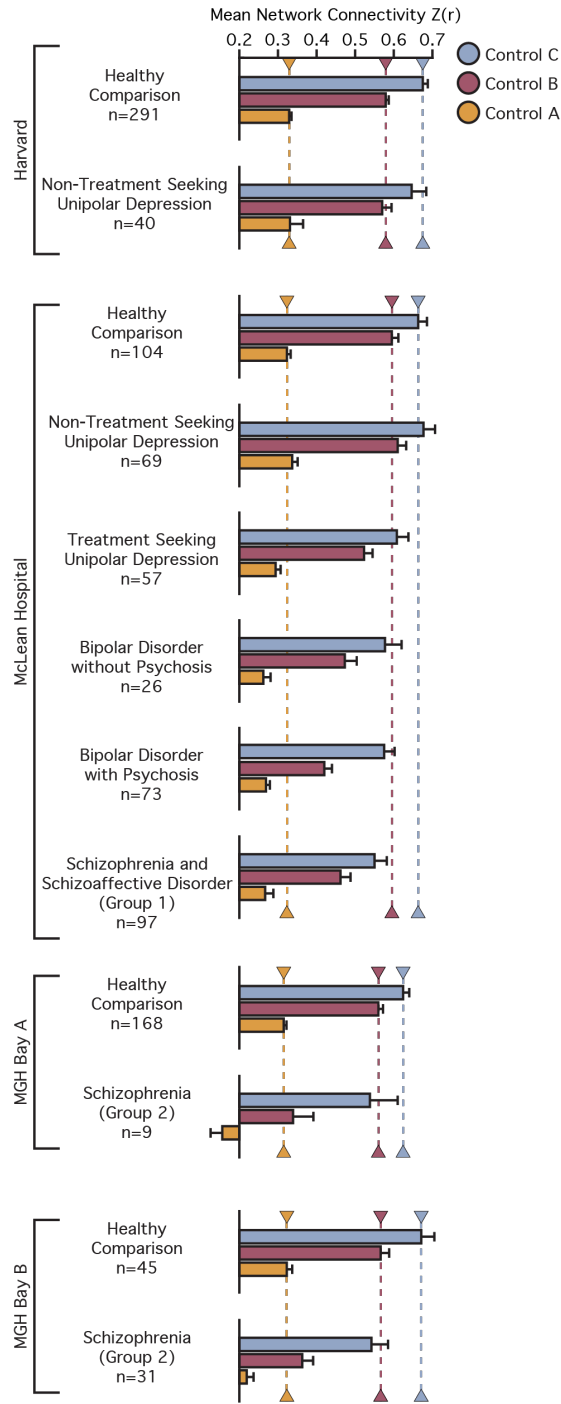

Supplemental Figure 1. Disruptions in frontoparietal network connectivity are evident across scanner and site of acquisition. Bar graphs reflect mean network connectivity for each group. Error bars denote standard error. Functional connectivity difference matrices were obtained by an analysis of variance of z-transformed Pearson correlation values, accounting for the effects of the coil, console software version, age, sex, race, ethnicity, and handedness.

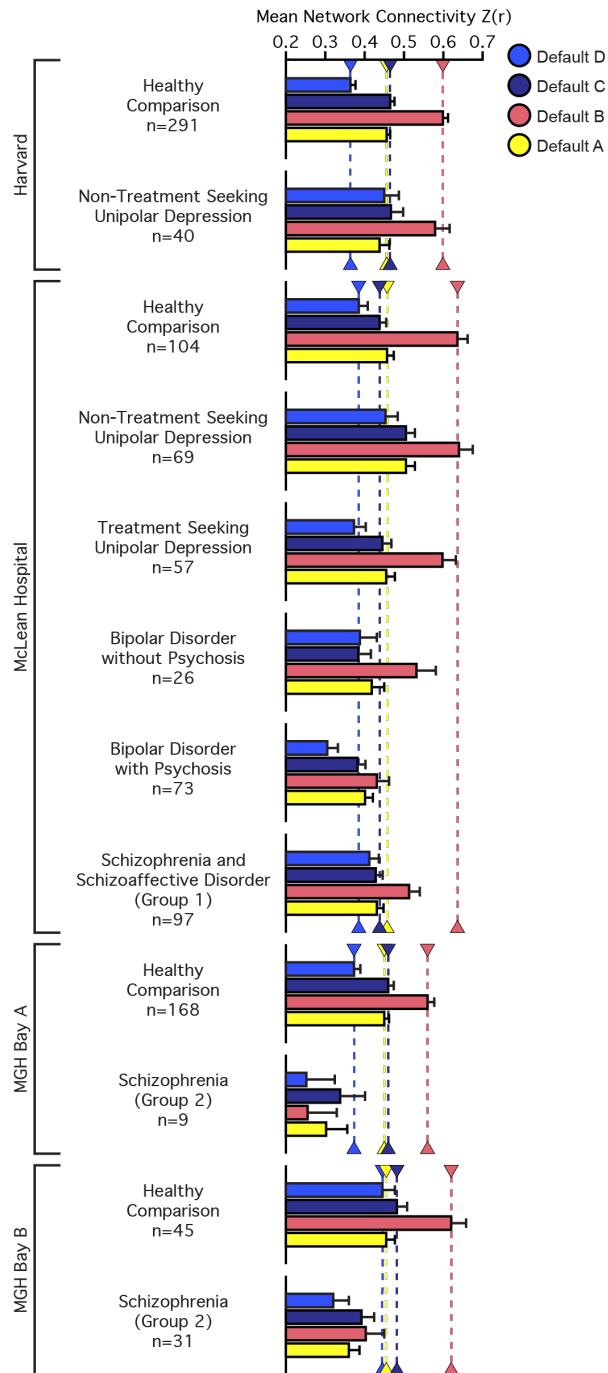

Supplemental Figure 2. Psychotic illness associates with a preferential reduction in default network integrity across scanner and site of acquisition. Bar graphs reflect mean network connectivity for each group within default A, B, C, and D. Error bars denote standard error. Functional connectivity difference matrices were obtained by an analysis of variance of z-transformed Pearson correlation values after linear regression of the effects of coil, console software version, age, sex, race, ethnicity, and handedness.

Supplemental Table 1. Participant demographics

|                                        | Healthy Comparison | Non-Treatment Seeking Depression | Treatment Seeking Depression | Bipolar Disorder (w/o psychosis) | Bipolar Disorder (psychosis) | Scz Group1            | Scz Group 2        | Healthy Comparison vs |         |          |       |        |        |     |      |
|----------------------------------------|--------------------|----------------------------------|------------------------------|----------------------------------|------------------------------|-----------------------|--------------------|-----------------------|---------|----------|-------|--------|--------|-----|------|
|                                        |                    |                                  |                              |                                  |                              |                       |                    | NTSD                  | TSD     | BD w/o   | BD w/ | SZ gp1 | SZ gp2 |     |      |
| Network                                | n=608              | n=109                            | n=57                         | n=26                             | n=73                         | n=97                  | n=40               | $F_{6,1003} / \chi^2$ | p-value | p-values |       |        |        |     |      |
| Age                                    | 33.6±13.5          | 30.1±10.9                        | 35.0±13.7                    | 38.7±15.3                        | 31.3±11.4                    | 33.3±12.0             | 44.8±10.6          | 1248.6                | <0.001  |          |       |        |        |     | **** |
| Age range                              | 18-71              | 18-64                            | 18-68                        | 20-71                            | 18-63                        | 18-65                 | 20-62              |                       |         |          |       |        |        |     |      |
| Percent female                         | 44.9               | 66.1                             | 57.9                         | 53.8                             | 35.6                         | 32.0                  | 22.5               | 41.5                  | <0.001  | ****     |       |        |        | *   | ***  |
| Percent right handed                   | 91.4               | 100.0                            | 89.5                         | 92.3                             | 84.9                         | 84.5                  | 80.0               | 30.3                  | <0.005  | **       |       |        |        | *   | ***  |
| Percent White (not Hispanic or Latino) | 65.1               | 65.2                             | 80.4                         | 69.2                             | 75.3                         | 70.1                  | 67.5               | 4.5                   | 0.62    |          |       |        |        |     |      |
| YMRS                                   | N/A                | N/A                              | n=54<br>4.46±3.96            | n=24<br>5.71±3.78                | n=73<br>21.70±11.15          | n=92<br>14.26±8.89    | N/A                | 49.88                 | <0.001  | N/A      | N/A   | N/A    | N/A    | N/A | N/A  |
| PANSS positive                         | N/A                | N/A                              | n=53<br>8.89±2.38            | n=24<br>9.08±2.23                | n=73<br>19.33±7.44           | n=92<br>18.77±6.53    | n=37<br>18.11±5.99 | 39.46                 | <0.001  | N/A      | N/A   | N/A    | N/A    | N/A | N/A  |
| PANSS negative                         | N/A                | N/A                              | 14.53±4.66                   | 12.38±3.45                       | 10.64±4.49                   | 15.89±8.03            | 21.49±5.12         | 22.44                 | <0.001  | N/A      | N/A   | N/A    | N/A    | N/A | N/A  |
| PANSS general                          | N/A                | N/A                              | 36.17±6.07                   | 35.21±6.55                       | 29.78±7.43                   | 33.17±9.04            | 36.84±6.25         | 8.16                  | <0.001  | N/A      | N/A   | N/A    | N/A    | N/A | N/A  |
| Average CPZ Equivalent                 | N/A                | N/A                              | N/A                          | N/A                              | n=73<br>380.65±277.69        | n=92<br>408.22±361.55 | N/A                | 0.29                  | 0.59    | N/A      | N/A   | N/A    | N/A    | N/A | N/A  |
| Slice SNR                              | 175.3±51.2         | 196.1±67.3                       | 195.6±53.3                   | 177.6±40.4                       | 140.7±65.4                   | 166.2±66.2            | 144.3±67.0         | 10.7                  | <0.001  | **       |       |        | ****   |     | *    |
| Number of micro-movements              | 20.3±24.7          | 15.1±20.4                        | 24.5±23.1                    | 24.8±17.4                        | 35.1±31.8                    | 25.9±26.6             | 37.9±35.6          | 8.4                   | <0.001  |          |       |        | ****   |     | **** |

\*Note: NTSD: community non-treatment seeking depression; TSD: unipolar treatment seeking depression; BD w/o: bipolar disorder without psychosis; BD w/: bipolar disorder with psychosis; SZ gp1: schizophrenia group 1; SZ gp2: schizophrenia group 2. N/A: Not available. Micro-movements reflect the number of relative translations in 3D space  $\geq 0.1$  mm. P-values for group comparisons \*  $\leq 0.05$  \*\*  $\leq 0.01$  \*\*\*  $\leq 0.005$  \*\*\*\*  $\leq 0.001$

Supplemental Table 1 Cont. Participant demographics

|                                        | Non-Treatment Seeking Depression vs |        |       |        |        | Treatment Seeking Depression vs |       |        |        | Bipolar Disorder (w/o psychosis) vs |        |        | Bipolar Disorder (psychosis) vs |        | Scz Group1 vs Scz Group2 |
|----------------------------------------|-------------------------------------|--------|-------|--------|--------|---------------------------------|-------|--------|--------|-------------------------------------|--------|--------|---------------------------------|--------|--------------------------|
|                                        | TSD                                 | BD w/o | BD w/ | SZ gp1 | SZ gp2 | BD w/o                          | BD w/ | SZ gp1 | SZ gp2 | BD w/                               | SZ gp1 | SZ gp2 | SZ gp1                          | SZ gp2 |                          |
| Network                                | p-values                            |        |       |        |        | p-values                        |       |        |        | p-values                            |        |        | p-values                        |        | p-values                 |
| Age                                    |                                     |        | *     |        | ****   |                                 |       |        | ***    |                                     |        |        |                                 | ****   | ****                     |
| Age range                              |                                     |        |       |        |        |                                 |       |        |        |                                     |        |        |                                 |        |                          |
| Percent female                         |                                     |        | ****  | ****   | ****   |                                 | *     | ***    | ****   |                                     | *      | **     |                                 |        |                          |
| Percent right handed                   | ***                                 | ***    | ****  | ****   | ****   |                                 |       |        |        |                                     |        |        |                                 |        |                          |
| Percent White (not Hispanic or Latino) |                                     |        |       |        |        |                                 |       |        |        |                                     |        |        |                                 |        |                          |
| YMRS                                   | N/A                                 | N/A    | N/A   | N/A    | N/A    |                                 | ****  | ****   | N/A    | ****                                | ****   | N/A    | ****                            | N/A    | N/A                      |
| PANSS positive                         | N/A                                 | N/A    | N/A   | N/A    | N/A    |                                 | ****  | ****   | ****   | ****                                | ****   | ****   |                                 |        |                          |
| PANSS negative                         | N/A                                 | N/A    | N/A   | N/A    | N/A    |                                 | ****  |        | ****   |                                     | **     | ****   | ****                            | ****   | ****                     |
| PANSS general                          | N/A                                 | N/A    | N/A   | N/A    | N/A    |                                 | ****  | *      |        | ***                                 |        |        | ***                             | ****   | *                        |
| Average CPZ Equivalent                 | N/A                                 | N/A    | N/A   | N/A    | N/A    | N/A                             | N/A   | N/A    | N/A    | N/A                                 |        | N/A    | N/A                             | N/A    | N/A                      |
| Slice SNR                              |                                     |        | ****  | ***    | ****   |                                 | ****  | *      | ****   | *                                   |        |        | *                               |        |                          |
| Number of micro-movements              |                                     |        | ****  | *      | ****   |                                 |       |        |        |                                     |        |        |                                 |        |                          |

\*Note: NTSD: community non-treatment seeking depression; TSD: unipolar treatment seeking depression; BD w/o: bipolar disorder without psychosis; BD w/: bipolar disorder with psychosis; SZ gp1: schizophrenia group 1; SZ gp2: schizophrenia group 2. P-values for group comparisons \* ≤0.05 \*\*≤0.01 \*\*\* ≤0.005 \*\*\*\* ≤0.001

Supplemental Table 2. Network interactions affected by psychiatric illnesses with or without psychosis

| Network            | Healthy Comparison | Patients without psychosis | Patients with psychosis | $F_{2,1001}$ | $\mu^2$ | p-value | HC vs Pw/o | HC vs PP | PP vs Pw/o |
|--------------------|--------------------|----------------------------|-------------------------|--------------|---------|---------|------------|----------|------------|
|                    | n=608              | n=192                      | n=210                   |              |         |         | p-values   |          |            |
| Default D          | 0.38±0.22          | 0.41±0.24                  | 0.35±0.21               | 2.66         | 0.01    | 0.07    | 0.06       | 0.33     | ≤0.05      |
| Default C          | 0.46±0.19          | 0.46±0.17                  | 0.40±0.16               | 8.84         | 0.02    | ≤0.001  | 0.84       | ≤0.001   | ≤0.005     |
| Default B          | 0.60±0.23          | 0.60±0.25                  | 0.45±0.28               | 23.72        | 0.05    | ≤0.001  | 0.55       | ≤0.001   | ≤0.001     |
| Default A          | 0.46±0.15          | 0.46±0.16                  | 0.40±0.18               | 6.41         | 0.01    | ≤0.005  | 0.93       | ≤0.001   | ≤0.01      |
| Control C          | 0.66±0.22          | 0.64±0.24                  | 0.55±0.19               | 14.42        | 0.03    | ≤0.001  | 0.14       | ≤0.001   | ≤0.005     |
| Control B          | 0.58±0.16          | 0.56±0.16                  | 0.42±0.18               | 63.95        | 0.11    | ≤0.001  | ≤0.01      | ≤0.001   | ≤0.001     |
| Control A          | 0.33±0.11          | 0.31±0.11                  | 0.26±0.11               | 25.65        | 0.05    | ≤0.001  | 0.06       | ≤0.001   | ≤0.001     |
| Limbic             | 0.38±0.26          | 0.33±0.28                  | 0.31±0.27               | 6.52         | 0.01    | ≤0.005  | 0.08       | ≤0.001   | 0.21       |
| Salience           | 0.45±0.13          | 0.45±0.13                  | 0.38±0.14               | 20.39        | 0.04    | ≤0.001  | 0.18       | ≤0.001   | ≤0.001     |
| Ventral attention  | 0.46±0.14          | 0.46±0.15                  | 0.40±0.16               | 9.86         | 0.02    | ≤0.001  | 0.48       | ≤0.001   | ≤0.005     |
| Dorsal attention B | 0.48±0.17          | 0.50±0.17                  | 0.45±0.19               | 3.01         | 0.01    | ≤0.05   | 0.35       | ≤0.05    | ≤0.05      |
| Dorsal attention A | 0.68±0.23          | 0.71±0.22                  | 0.63±0.27               | 4.54         | 0.01    | ≤0.05   | 0.24       | ≤0.05    | ≤0.005     |
| Somatomotor B      | 0.67±0.17          | 0.65±0.18                  | 0.62±0.17               | 6.88         | 0.01    | ≤0.001  | 0.09       | ≤0.001   | 0.16       |
| Somatomotor A      | 0.61±0.25          | 0.58±0.26                  | 0.44±0.26               | 26.58        | 0.05    | ≤0.001  | ≤0.05      | ≤0.001   | ≤0.001     |
| Visual peripheral  | 1.05±0.25          | 1.08±0.26                  | 0.99±0.24               | 2.68         | 0.01    | 0.07    | 0.53       | ≤0.05    | ≤0.05      |
| Visual central     | 0.72±0.31          | 0.80±0.32                  | 0.84±0.27               | 14.83        | 0.03    | ≤0.001  | ≤0.01      | ≤0.001   | 0.08       |

\*Note: Values reflect mean of raw z-transformed Pearson correlation values ± standard deviation across all regional interactions for that network; HC: healthy comparison participants; Pw/o: patients without psychosis; PP: patients with psychosis.

Supplemental Table 3. Network interactions affected by psychiatric illnesses with or without psychosis

| Network            | Healthy Comparison<br>n=608 | Non-Treatment Seeking Depression<br>n=109 | Treatment Seeking Depression<br>n=57 | Bipolar Disorder (w/o psychosis)<br>n=26 | Bipolar Disorder (psychosis)<br>n=73 | Scz Group1<br>n=97 | Scz Group 2<br>n=40 | F <sub>6,997</sub> | μ <sup>2</sup> | p-value | Healthy Comparison vs |     |        |       |        |        |
|--------------------|-----------------------------|-------------------------------------------|--------------------------------------|------------------------------------------|--------------------------------------|--------------------|---------------------|--------------------|----------------|---------|-----------------------|-----|--------|-------|--------|--------|
|                    |                             |                                           |                                      |                                          |                                      |                    |                     |                    |                |         | NTSD                  | TSD | BD w/o | BD w/ | SZ gp1 | SZ gp2 |
| Default D          | 0.38±0.22                   | 0.44±0.27                                 | 0.37±0.20                            | 0.37±0.20                                | 0.31±0.20                            | 0.41±0.22          | 0.29±0.17           | 3.67               | 0.02           | ≤0.001  | ***                   |     |        | **    |        |        |
| Default C          | 0.46±0.19                   | 0.48±0.18                                 | 0.45±0.15                            | 0.38±0.14                                | 0.38±0.14                            | 0.42±0.17          | 0.36±0.14           | 4.98               | 0.03           | ≤0.001  |                       |     | *      | ****  | *      | *      |
| Default B          | 0.60±0.23                   | 0.63±0.25                                 | 0.59±0.25                            | 0.49±0.22                                | 0.44±0.26                            | 0.51±0.28          | 0.35±0.30           | 9.47               | 0.05           | ≤0.001  |                       |     |        | ****  | ****   | ****   |
| Default A          | 0.46±0.15                   | 0.48±0.16                                 | 0.46±0.14                            | 0.40±0.16                                | 0.41±0.17                            | 0.43±0.19          | 0.34±0.16           | 3.45               | 0.02           | ≤0.005  |                       |     |        | **    |        | ****   |
| Control C          | 0.66±0.22                   | 0.68±0.25                                 | 0.60±0.22                            | 0.55±0.21                                | 0.57±0.20                            | 0.55±0.19          | 0.54±0.17           | 5.79               | 0.03           | ≤0.001  |                       |     |        | ****  | ****   | *      |
| Control B          | 0.58±0.16                   | 0.61±0.16                                 | 0.51±0.14                            | 0.44±0.16                                | 0.42±0.18                            | 0.46±0.18          | 0.35±0.16           | 25.20              | 0.13           | ≤0.001  |                       | *** | ****   | ****  | ****   | ****   |
| Control A          | 0.33±0.11                   | 0.34±0.11                                 | 0.29±0.10                            | 0.25±0.08                                | 0.28±0.11                            | 0.28±0.11          | 0.20±0.08           | 12.71              | 0.07           | ≤0.001  |                       | *   | ****   | ****  | ****   | ****   |
| Limbic             | 0.38±0.26                   | 0.36±0.28                                 | 0.27±0.28                            | 0.29±0.24                                | 0.30±0.25                            | 0.35±0.27          | 0.26±0.28           | 3.63               | 0.02           | ≤0.001  |                       | **  |        | ***   |        | *      |
| Salience           | 0.45±0.13                   | 0.46±0.12                                 | 0.44±0.12                            | 0.39±0.14                                | 0.38±0.14                            | 0.40±0.14          | 0.34±0.15           | 7.52               | 0.04           | ≤0.001  |                       |     |        | ****  | ****   | ****   |
| Ventral attention  | 0.46±0.14                   | 0.48±0.16                                 | 0.46±0.14                            | 0.41±0.14                                | 0.42±0.15                            | 0.41±0.17          | 0.33±0.14           | 4.09               | 0.02           | ≤0.001  |                       |     |        | *     | **     | ****   |
| Dorsal attention B | 0.48±0.17                   | 0.52±0.18                                 | 0.48±0.15                            | 0.45±0.18                                | 0.45±0.16                            | 0.48±0.21          | 0.35±0.15           | 2.81               | 0.02           | ≤0.01   |                       |     |        |       |        | ****   |
| Dorsal attention A | 0.68±0.23                   | 0.72±0.23                                 | 0.73±0.20                            | 0.64±0.17                                | 0.64±0.26                            | 0.68±0.26          | 0.46±0.23           | 4.15               | 0.02           | ≤0.001  |                       |     |        |       |        | ****   |
| Somatomotor B      | 0.67±0.17                   | 0.68±0.20                                 | 0.64±0.15                            | 0.59±0.17                                | 0.68±0.18                            | 0.59±0.16          | 0.55±0.14           | 4.95               | 0.03           | ≤0.001  |                       |     |        |       | ****   | ****   |
| Somatomotor A      | 0.61±0.25                   | 0.64±0.27                                 | 0.53±0.21                            | 0.44±0.25                                | 0.50±0.25                            | 0.45±0.25          | 0.32±0.25           | 10.94              | 0.06           | ≤0.001  |                       |     | ***    | ****  | ****   | ****   |
| Visual peripheral  | 1.05±0.25                   | 1.10±0.30                                 | 1.07±0.20                            | 0.99±0.25                                | 0.99±0.24                            | 1.03±0.24          | 0.89±0.21           | 1.77               | 0.01           | 0.10    |                       |     |        | *     |        | *      |
| Visual central     | 0.72±0.31                   | 0.76±0.34                                 | 0.83±0.29                            | 0.87±0.26                                | 0.85±0.21                            | 0.84±0.32          | 0.81±0.21           | 5.65               | 0.03           | ≤0.001  |                       | *   | *      | ****  | ****   | *      |

\*Note: Values reflect mean of raw z-transformed Pearson correlation values ± standard deviation across all regional interactions for that network. NTSD: community non-treatment seeking depression; TSD: unipolar treatment seeking depression; BD w/o: bipolar disorder without psychosis; BD w/: bipolar disorder with psychosis; SZ gp1: schizophrenia group 1; SZ gp2: schizophrenia group 2. P-values for group comparisons \* ≤0.05 \*\*≤0.01 \*\*\* ≤0.005 \*\*\*\* ≤0.001

Supplemental Table 3 Cont. Network interactions affected by psychiatric illnesses with or without psychosis

|                    | Non-Treatment Seeking Depression vs |      |      |      |      | Treatment Seeking Depression vs |   |      |    | Bipolar Disorder (w/o psychosis) vs |    |    | Bipolar Disorder (psychosis) vs |      | Scz Group1 vs Scz Group2 |
|--------------------|-------------------------------------|------|------|------|------|---------------------------------|---|------|----|-------------------------------------|----|----|---------------------------------|------|--------------------------|
|                    | TSD                                 | Bw/o | B    | S1   | S2   | Bw/o                            | B | S1   | S2 | B                                   | S1 | S2 | S1                              | S2   |                          |
| Network            | p-values                            |      |      |      |      | p-values                        |   |      |    | p-values                            |    |    | p-values                        |      | p-values                 |
| Default D          | *                                   |      | **** |      | ***  |                                 |   |      |    |                                     |    |    | ****                            |      | *                        |
| Default C          |                                     | ***  | **** | **   | ***  | *                               |   |      |    |                                     |    |    |                                 |      |                          |
| Default B          |                                     |      | **** | *    | **** | ***                             | * | **** |    |                                     |    |    | *                               |      | *                        |
| Default A          |                                     |      | **   |      | **** |                                 |   |      | *  |                                     |    |    |                                 |      | *                        |
| Control C          |                                     | *    | ***  | **** | *    |                                 |   |      |    |                                     |    |    |                                 |      |                          |
| Control B          | *                                   | **** | **** | **** | **** | ****                            | * | **** |    |                                     |    |    | *                               |      | *                        |
| Control A          | **                                  | **** | **** | **** | **** |                                 |   | **** |    |                                     |    |    |                                 | *    | ***                      |
| Limbic             | *                                   |      | *    |      | *    |                                 |   |      |    |                                     |    |    |                                 |      |                          |
| Salience           |                                     |      | **** | *    | *    | ****                            | * | *    |    |                                     |    |    |                                 |      |                          |
| Ventral attention  |                                     |      |      |      | **   | *                               | * | *    |    |                                     |    |    |                                 |      |                          |
| Dorsal attention B |                                     |      | *    |      | **** |                                 |   |      |    |                                     |    |    |                                 |      | ***                      |
| Dorsal attention A |                                     |      |      |      | **** |                                 |   | **** |    |                                     | *  |    | *                               |      | ****                     |
| Somatomotor B      |                                     |      |      | *    | *    |                                 |   |      |    |                                     |    |    | ****                            | **** |                          |
| Somatomotor A      |                                     | *    |      | **** | **** |                                 | * | **** |    |                                     |    |    |                                 | ***  | *                        |
| Visual peripheral  |                                     |      | *    |      | *    | *                               |   | *    |    |                                     |    |    |                                 |      |                          |
| Visual central     |                                     |      | *    | *    |      |                                 |   |      |    |                                     |    |    |                                 |      |                          |

\*Note: CD: community depression; UD: unipolar depression; Bw/o: bipolar depression without psychosis; B: bipolar depression with psychosis; S1: schizophrenia group 1; S2: schizophrenia group 2. P-values for group comparisons \* ≤0.05 \*\*≤0.01 \*\*\* ≤0.005 \*\*\*\* ≤0.001
